# Supplementary material
Source: MDPI journal article supplement (https://www.mdpi.com/2076-3417/11/15/6742)
Supplement: s1 [file s1]

# Supplementary Materials: Optical chirality determined from Mueller matrices

Hans Arwin\* <sup>1</sup>, Stefan Schoeche <sup>2</sup>, James Hilfiker <sup>3</sup>, Mattias Hartveit <sup>4</sup>, Kenneth Järrendahl <sup>5</sup>, Olga Rubi Juárez-Rivera <sup>6</sup>, Arturo Mendoza-Galván <sup>7</sup> and Roger Magnusson <sup>8</sup>

## 1. Depolarization

Some of the samples studied exhibit depolarization. This can be quantified with the depolarization index defined by [1]

$$P_D = \sqrt{\frac{\sum_{ij}(m_{ij}^2 - m_{11}^2)}{3m_{11}^2}}, \quad (1)$$

where  $m_{ij}$  ( $i,j=1..4$ ) are Mueller matrix elements.

In addition we present, for some samples, the depolarization matrix  $\mathbf{L}_u$  obtained in a differential decomposition  $\mathbf{L} = \ln \mathbf{M} = \mathbf{L}_m + \mathbf{L}_u$ . In the notation in Ref. [2], this matrix can be written as

$$\mathbf{L}_u = \begin{bmatrix} 0 & d_1 & d_2 & d_3 \\ -d_1 & -d_7 & d_6 & d_5 \\ -d_2 & d_6 & -d_8 & d_4 \\ -d_3 & d_5 & d_4 & -d_9 \end{bmatrix}, \quad (2)$$

where the isotropic absorption has been subtracted. The diagonal elements  $-d_7$ ,  $-d_8$  and  $-d_9$  represent the anisotropic depolarizations for  $xy$ ,  $\pm 45$  and circular polarizations, respectively, and the off-diagonal elements the uncertainties in the corresponding parameters in  $\mathbf{L}_m$ . A detailed analysis and physical interpretation of the elements of  $\mathbf{L}_u$  is found in Ref. [2].

### 1.1. Depolarization of *Cetonia aurata* cuticle samples

Figure S1 shows the depolarization indices for samples CA1 and CA2.

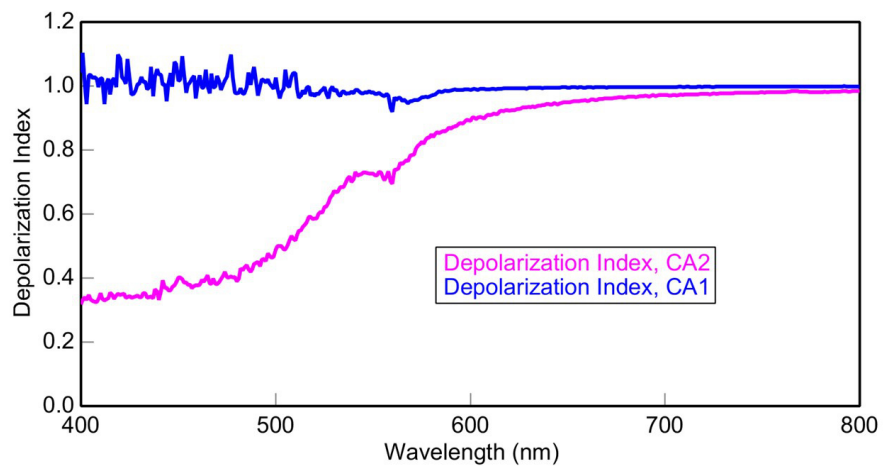

**Figure S1.** Depolarization index for cuticle samples CA1 and CA2.

A more detailed view of the depolarization is given by the  $\mathbf{L}_u$  matrices for samples CA1 and CA2 in Figures S2 and S3, respectively. All off-diagonal elements show small depolarization compared to the diagonal elements. The diagonal elements  $-d_7$ ,  $-d_8$  and  $-d_9$  show depolarization for both linear and circular anisotropy for wavelengths

shorter than 600 nm. Sample CA2 has larger depolarization compared to sample CA1 confirming the data in Figure S1.

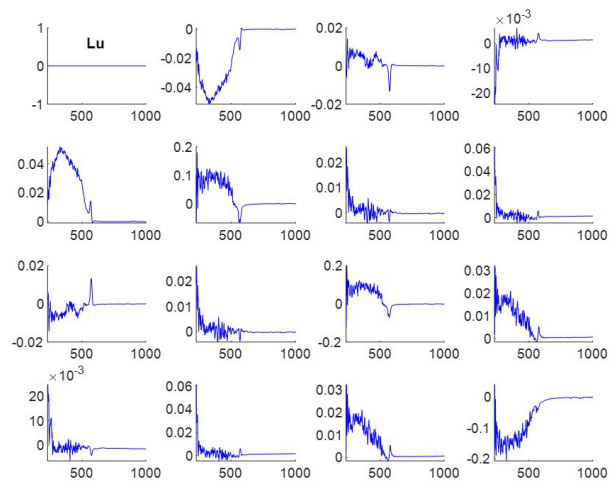

**Figure S2.**  $L_u$  matrix for sample CA1. Notice that autoscaling is used.

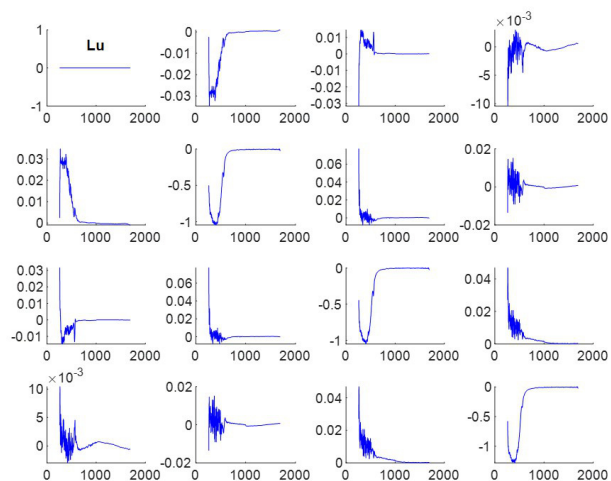

**Figure S3.**  $L_u$  matrix for sample CA2. Notice that autoscaling is used.

## 1.2. Depolarization of CNC samples

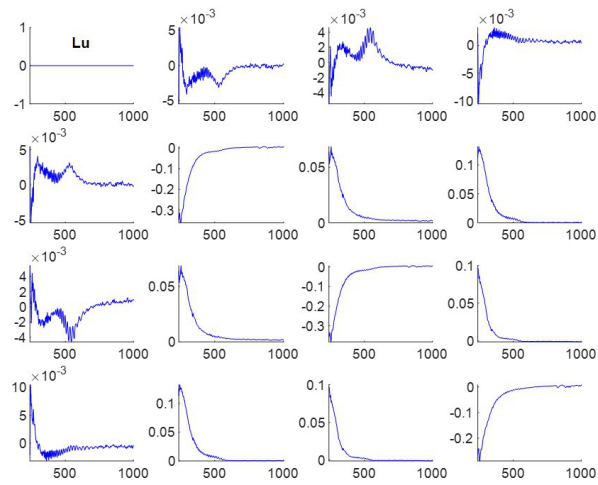

**Figure S4.**  $L_u$  matrix for sample CNC.

## Abbreviations

The following abbreviations are used in this manuscript:

|      |                                                |
|------|------------------------------------------------|
| MDPI | Multidisciplinary Digital Publishing Institute |
| DOAJ | Directory of open access journals              |
| CNC  | Cellulose nanocrystals                         |

## References

1. Gil, J. J., Bernabeu, E. Depolarization and Polarization Indices of an Optical System. *Opt. Acta* **1986**, *33*, 185-189.
2. Ossikovski, R, Arteaga, O. Statistical meaning of the differential Mueller matrix of depolarizing homogeneous media. *Opt. Lett.* **2014**, *39*, 4470-4473.
